# Supplementary material for: Treatment preferences of patients with chronic low back pain in physical therapy clinics in Saudi Arabia: a cross-sectional study
Source: PeerJ journal article supplement (doi:10.7717/peerj.19274), 2025-04-14
Supplement: Raw_data.xlsx [file Raw_data.xlsx]

## Sheet: Sheet1
	Demographic						Medical Hx						Current LBP			Treatment options selected by patient
ID	Sex	Age	BMI	Marital st	Educational level	Occupatianl st	Traumatic Hx	Medical comorbidity	Maternity Hx	Maternity history	Past surgeries	Previous PT	Site of pain	Onsets of pain	Duration of pain	Treatment options selected by patient	Recommended
66	M	18	Normal	Single	Intermediate	Non-employed	No	No	NA	NA	Yes	No	with leg pain	Gradual	More than 3 months	Exercise in general	yes
92	F	20	Normal	Single	High	Student	No	No	NA	NA	No	More than 3 months	Low Back	Gradual	More than 3 months	Exercise in general	yes
19	F	21	Normal	Single	Primary	Non-employed	No	No	NA	NA	No	No	with leg pain	Gradual	More than 3 months	Lumbar brace or corset	No
110	F	21	Normal	Single	Primary	Non-employed	Blow	No	Primiparous	NA	No	No	with leg pain	Gradual	More than 3 months	Ice or Heat	No
7	F	22	Obese	Single	High	Student	No	No	NA	NA	No	No	Low Back	Gradual	More than 3 months	Spinal manipulation (thrust)	yes
9	F	22	Overweight	Single	High	Student	Fall down	No	NA	NA	No	No	Low Back	Gradual	More than 3 months	Spinal manipulation (thrust)	yes
15	F	22	Overweight	Married	Intermediate	Non-employed	No	No	Multiparous	Vagianl delivery	No	No	Low Back	Gradual	More than 3 months	Spinal manipulation (thrust)	yes
26	F	22	Obese	Single	High	Non-employed	Fall down	Other	NA	NA	No	3 months or less	with leg pain	Sudden	More than 3 months	Lumbar stabilization exercises	yes
42	F	22	Normal	Single	Intermediate	Non-employed	Fall down	No	NA	NA	No	More than 3 months	Low Back	Sudden	More than 3 months	Exercise in general	yes
90	F	22	Underweight	Single	High	Student	No	No	NA	NA	No	No	with leg pain	Sudden	More than 3 months	Exercise in general	yes
80	M	23	Normal	Single	Intermediate	Employed	No	Multi	NA	NA	No	More than 3 months	with leg pain	Gradual	More than 3 months	Exercise in general	yes
143	F	23	Underweight	Single	High	Employed	No	No	NA	NA	No	No	Low Back	Gradual	More than 3 months	Interferential current or transcutaneous electrical nerve stimulation	No
6	F	24	Normal	Married	High	Student	No	No	Multiparous	Vagianl delivery	No	No	Low Back	Gradual	More than 3 months	Spinal manipulation (thrust)	yes
14	F	24	Overweight	Single	High	Student	Accident	No	NA	NA	No	No	Low Back	Gradual	More than 3 months	Lumbar stabilization exercises	yes
51	F	24	Overweight	Single	High	Student	Accident	No	NA	NA	No	No	Low Back	Gradual	More than 3 months	Exercise in general	yes
73	F	24	Overweight	Married	Primary	Non-employed	Fall down	No	Primiparous	Vagianl delivery	No	No	with leg pain	Gradual	More than 3 months	Exercise in general	yes
13	F	25	Obese	Single	High	Non-employed	Fall down	No	NA	NA	No	3 months or less	with leg pain	Sudden	More than 3 months	Exercise in general	yes
53	F	25	Normal	Single	High	Non-employed	No	No	NA	NA	No	No	Low Back	Gradual	More than 3 months	Exercise in general	yes
91	M	25	Normal	Single	High	Employed	No	No	NA	NA	Yes	More than 3 months	Low Back	Gradual	More than 3 months	Aerobic and Fitness Exercises	yes
94	M	25	Overweight	Single	High	Student	Accident	DM	NA	NA	No	More than 3 months	Low Back	Gradual	More than 3 months	Exercise in general	yes
29	F	26	Normal	Married	Intermediate	Non-employed	No	No	Multiparous	CS	Yes	No	with leg pain	Gradual	More than 3 months	Lumbar stabilization exercises	No
116	F	26	Obese	Single	High	Employed	No	No	NA	NA	No	No	Low Back	Sudden	More than 3 months	Spinal mobilization (non-thrust)	yes
99	M	27	Normal	Married	High	Employed	No	No	NA	NA	No	No	Low Back	Gradual	More than 3 months	Exercise in general	yes
2	F	28	Normal	Single	Intermediate	Non-employed	Fall down	No	NA	NA	No	3 months or less	Low Back	Gradual	More than 3 months	Interferential current or transcutaneous electrical nerve	No
74	F	28	Normal	Single	High	Non-employed	No	No	NA	NA	No	No	Low Back	Gradual	More than 3 months	Ice or Heat	No
75	F	28	Overweight	Single	High	Non-employed	No	No	NA	NA	No	No	Low Back	Gradual	More than 3 months	Exercise in general	yes
151	F	28	Overweight	Single	High	Non-employed	Fall down	No	NA	NA	No	No	Low Back	Gradual	More than 3 months	Laser or ultrasound	No
20	F	29	Normal	Married	Primary	Non-employed	No	No	NA	NA	No	No	with leg pain	Gradual	More than 3 months	Spinal mobilization (non-thrust)	yes
111	F	29	Normal	Married	Primary	Non-employed	No	Other	Multiparous	Epidural anesthesia	No	No	with leg pain	Gradual	More than 3 months	Taping	No
32	F	30	Normal	Single	High	Non-employed	No	No	NA	NA	No	3 months or less	with leg pain	Gradual	More than 3 months	Exercise in general	yes
49	F	30	Normal	Married	High	Employed	Fall down	No	Multiparous	Vagianl delivery	No	No	Low Back	Sudden	More than 3 months	Spinal mobilization (non-thrust)	yes
87	F	30	Normal	Single	High	Employed	No	No	NA	CS	Yes	3 months or less	with leg pain	Gradual	More than 3 months	Exercise in general	yes
\	F	30	Obese	Married	High	Employed	No	No	Multiparous	Vagianl delivery	No	No	Low Back	Gradual	More than 3 months	Exercise in general	yes
124	F	31	Overweight	Married	Intermediate	Non-employed	No	No	Multiparous	Vagianl delivery	No	More than 3 months	Low Back	Gradual	More than 3 months	Bed rest	No
52	F	32	Normal	Married	High	Employed	No	No	Multiparous	Epidural anesthesia	No	3 months or less	Low Back	Gradual	More than 3 months	Directional preference exercises: flexion	yes
88	F	32	Overweight	Married	High	Employed	No	No	Primiparous	Vagianl delivery	No	3 months or less	Low Back	Sudden	More than 3 months	Exercise in general	yes
106	F	32	Normal	Married	Primary	Non-employed	No	No	Multiparous	Vagianl delivery	No	No	with leg pain	Gradual	More than 3 months	Exercise in general	yes
23	F	33	Overweight	Married	High	Employed	No	No	Multiparous	Vagianl delivery	No	No	Low Back	Gradual	More than 3 months	Interferential current or transcutaneous electrical nerve stimulation	No
33	M	33	Normal	Married	Intermediate	Employed	No	No	NA	NA	No	3 months or less	Low Back	Gradual	More than 3 months	Exercise in general	yes
64	F	33	Obese	Single	Intermediate	Non-employed	No	No	NA	NA	No	No	with leg pain	Gradual	More than 3 months	Interferential current or transcutaneous electrical nerve stimulation	No
77	F	33	Overweight	Single	High	Non-employed	No	No	NA	NA	No	No	with leg pain	Sudden	More than 3 months	Exercise in general	yes
61	M	34	Overweight	Married	Primary	Employed	No	No	NA	NA	Yes	More than 3 months	with leg pain	Sudden	More than 3 months	Interferential current or transcutaneous electrical nerve stimulation	No
150	F	34	Normal	Divorced	High	Non-employed	No	No	NA	NA	No	No	Low Back	Sudden	More than 3 months	Exercise in general	yes
39	F	35	Obese	Married	Intermediate	Non-employed	No	Other	Multiparous	CS	No	No	Low Back	Sudden	More than 3 months	Exercise in general	yes
131	M	35	Normal	Divorced	High	Employed	No	No	NA	NA	No	3 months or less	Low Back	Gradual	More than 3 months	Spinal manipulation (thrust)	yes
60	M	36	Overweight	Married	Primary	Employed	No	No	NA	NA	No	No	with leg pain	Sudden	More than 3 months	Exercise in general	yes
76	F	36	Overweight	Married	High	Employed	No	No	Multiparous	Vagianl delivery	No	No	Low Back	Gradual	More than 3 months	Interferential current or transcutaneous electrical nerve stimulation	No
145	F	36	Overweight	Married	High	Non-employed	No	No	Multiparous	Vagianl delivery	No	No	Low Back	Sudden	More than 3 months	Spinal mobilization (non-thrust)	yes
41	F	37	Obese	Married	Intermediate	Non-employed	Fall down	Multi	NA	NA	No	No	with leg pain	Gradual	More than 3 months	Interferential current or transcutaneous electrical nerve stimulation	No
120	M	37	Overweight	Married	High	Employed	Fall down	Other	NA	NA	No	No	Low Back	Gradual	More than 3 months	Spinal manipulation (thrust)	yes
127	F	37	Overweight	Married	Intermediate	Non-employed	No	DM	Multiparous	Vagianl delivery	No	3 months or less	with leg pain	Gradual	More than 3 months	Spinal manipulation (thrust)	yes
96	M	38	Overweight	Married	High	Employed	No	Other	NA	NA	No	No	Low Back	Gradual	More than 3 months	Interferential current or transcutaneous electrical nerve stimulation	No
113	F	38	Obese	Married	High	Employed	No	No	Multiparous	Epidural anesthesia	No	No	with leg pain	Gradual	More than 3 months	Exercise in general	yes
114	F	38	Normal	Single	High	Employed	No	No	NA	NA	No	3 months or less	with leg pain	Gradual	More than 3 months	Exercise in general	yes
138	M	38	Normal	Married	High	Employed	Accident	No	NA	NA	No	More than 3 months	Low Back	Gradual	More than 3 months	Spinal manipulation (thrust)	yes
152	F	38	Overweight	Married	High	Non-employed	No	No	NA	CS	No	No	with leg pain	Gradual	More than 3 months	Spinal mobilization (non-thrust)	yes
146	F	39	Overweight	Single	High	Employed	No	Other	NA	NA	No	3 months or less	with leg pain	Gradual	More than 3 months	Spinal mobilization (non-thrust)	yes
62	F	40	Normal	Single	Intermediate	Non-employed	No	Other	NA	NA	No	No	with leg pain	Gradual	More than 3 months	Exercise in general	yes
98	F	40	Overweight	Married	High	Employed	No	No	Multiparous	Vagianl delivery	No	No	Low Back	Gradual	More than 3 months	Spinal manipulation (thrust)	yes
148	F	40	Overweight	Married	High	Non-employed	No	No	Multiparous	CS	No	More than 3 months	Low Back	Gradual	More than 3 months	Spinal manipulation (thrust)	yes
149	M	40	Normal	Married	High	Employed	No	No	NA	NA	No	3 months or less	with leg pain	Gradual	More than 3 months	Exercise in general	yes
21	F	41	Obese	Married	Intermediate	Employed	No	No	Multiparous	Vagianl delivery	No	No	with leg pain	Gradual	More than 3 months	Bed rest	No
27	F	41	Obese	Married	Primary	Employed	Fall down	HTN	Multiparous	CS	No	No	with leg pain	Gradual	More than 3 months	Advice to pursue or maintain an active lifestyle	No
142	F	41	Obese	Married	High	Employed	No	No	Multiparous	Vagianl delivery	No	3 months or less	with leg pain	Gradual	More than 3 months	Interferential current or transcutaneous electrical nerve stimulation	No
56	M	42	Overweight	Married	High	Student	No	No	NA	NA	Yes	More than 3 months	with leg pain	Sudden	More than 3 months	Exercise in general	yes
5	F	43	Normal	Married	Intermediate	Non-employed	Blow	Multi	Multiparous	Vagianl delivery	No	More than 3 months	with leg pain	Sudden	More than 3 months	Interferential current or transcutaneous electrical nerve	No
11	F	43	Obese	Married	Primary	Non-employed	No	No	NA	Vagianl delivery	No	More than 3 months	Low Back	Gradual	More than 3 months	Exercise in general	yes
17	F	43	Overweight	Married	High	Employed	No	No	NA	NA	No	3 months or less	with leg pain	Gradual	More than 3 months	Exercise in general	yes
22	F	43	Obese	Married	Intermediate	Non-employed	No	No	Multiparous	Vagianl delivery	No	No	with leg pain	Gradual	More than 3 months	Ice or Heat	No
50	F	43	Overweight	Divorced	Intermediate	Non-employed	Accident	No	Multiparous	Vagianl delivery	No	No	Low Back	Gradual	More than 3 months	Exercise in general	yes
84	F	43	Overweight	Single	Primary	Non-employed	Fall down	Multi	NA	NA	No	3 months or less	with leg pain	Gradual	More than 3 months	Exercise in general	yes
108	F	43	Normal	Married	Primary	Non-employed	No	No	Primiparous	CS	No	3 months or less	with leg pain	Gradual	More than 3 months	Exercise in general	yes
47	M	44	Overweight	Married	High	Employed	No	No	NA	NA	No	3 months or less	Low Back	Gradual	More than 3 months	Exercise in general	yes
67	M	45	Obese	Married	Intermediate	Employed	Fall down	No	NA	NA	Yes	More than 3 months	with leg pain	Gradual	More than 3 months	Exercise in general	yes
144	F	45	Overweight	Married	High	Employed	No	No	Multiparous	Epidural anesthesia	No	No	with leg pain	Gradual	More than 3 months	Exercise in general	yes
79	F	46	Obese	Married	Primary	Non-employed	No	No	Multiparous	Vagianl delivery	No	No	Low Back	Gradual	More than 3 months	Laser or ultrasound	No
102	F	46	Normal	Married	High	Non-employed	No	No	Multiparous	Vagianl delivery	No	No	Low Back	Gradual	More than 3 months	Exercise in general	yes
40	F	47	Obese	Widow	High	Employed	No	Other	Multiparous	Vagianl delivery	Yes	3 months or less	Low Back	Gradual	More than 3 months	Advice to pursue or maintain an active lifestyle	no
83	F	47	Obese	Married	Intermediate	Non-employed	No	No	Multiparous	CS	No	No	Low Back	Gradual	More than 3 months	Bed rest	No
18	F	48	Obese	Single	Primary	Non-employed	No	DM	NA	NA	No	3 months or less	with leg pain	Gradual	More than 3 months	Exercise in general	yes
24	F	49	Overweight	Married	High	Employed	No	No	Multiparous	Vagianl delivery	No	3 months or less	with leg pain	Gradual	More than 3 months	Interferential current or transcutaneous electrical nerve stimulation	No
25	F	49	Obese	Divorced	Primary	Non-employed	No	DM	Multiparous	CS	No	No	with leg pain	Gradual	More than 3 months	Exercise in general	yes
37	F	49	Overweight	Married	Intermediate	Employed	No	No	Multiparous	Vagianl delivery	No	No	with leg pain	Gradual	More than 3 months	Ice or Heat	No
44	M	49	Obese	Married	Intermediate	Employed	No	No	NA	NA	No	No	with leg pain	Sudden	More than 3 months	Exercise in general	yes
123	F	49	Overweight	Married	Intermediate	Non-employed	No	No	Multiparous	Vagianl delivery	No	No	with leg pain	Sudden	More than 3 months	Ice or Heat	No
141	F	49	Overweight	Married	Intermediate	Non-employed	No	Other	Multiparous	Vagianl delivery	No	3 months or less	with leg pain	Gradual	More than 3 months	Interferential current or transcutaneous electrical nerve stimulation	No
1	F	50	Obese	Married	Intermediate	Non-employed	No	Multi	Multiparous	CS	No	No	with leg pain	Gradual	More than 3 months	Spinal manipulation (thrust)	yes
58	F	50	Obese	Married	Intermediate	Non-employed	No	No	Multiparous	Vagianl delivery	Yes	No	with leg pain	Gradual	More than 3 months	Ice or Heat	No
103	M	50	Normal	Married	High	Employed	No	No	NA	NA	No	No	with leg pain	Gradual	More than 3 months	Exercise in general	yes
105	F	50	Normal	Married	Primary	Non-employed	Fall down	DM	Multiparous	Vagianl delivery	No	More than 3 months	with leg pain	Gradual	More than 3 months	Exercise in general	yes
112	F	50	Obese	Married	Intermediate	Employed	Fall down	No	Multiparous	Vagianl delivery	No	No	with leg pain	Gradual	More than 3 months	Exercise in general	yes
121	M	50	Normal	Married	High	Employed	No	No	NA	NA	No	No	Low Back	Gradual	More than 3 months	Exercise in general	yes
135	M	52	Normal	Married	High	Employed	No	HTN	NA	NA	No	No	Low Back	Gradual	More than 3 months	Interferential current or transcutaneous electrical nerve stimulation	No
95	M	54	Normal	Married	High	Employed	No	No	NA	NA	No	No	Low Back	Gradual	More than 3 months	Exercise in general	yes
126	F	54	Obese	Married	Intermediate	Employed	No	DM	Primiparous	Epidural anesthesia	No	No	with leg pain	Gradual	More than 3 months	Interferential current or transcutaneous electrical nerve stimulation	No
3	F	55	Obese	Married	Primary	Non-employed	Fall down	Multi	Multiparous	Vagianl delivery	No	More than 3 months	Low Back	Gradual	More than 3 months	Interferential current or transcutaneous electrical nerve	No
4	F	55	Normal	Married	High	Retired	No	Multi	Multiparous	Vagianl delivery	No	More than 3 months	with leg pain	Gradual	More than 3 months	o Graded exercise exposure	yes
12	F	55	Obese	Married	Primary	Non-employed	No	Multi	Multiparous	NA	No	No	with leg pain	Gradual	More than 3 months	Interferential current or transcutaneous electrical nerve stimulation	No
16	F	55	Obese	Married	Primary	Non-employed	No	No	Multiparous	Vagianl delivery	No	3 months or less	with leg pain	Gradual	More than 3 months	Exercise in general	yes
30	F	55	Obese	Married	Primary	Non-employed	No	Multi	Multiparous	Vagianl delivery	No	No	with leg pain	Gradual	More than 3 months	Interferential current or transcutaneous electrical nerve stimulation	No
85	F	55	Normal	Divorced	Illiterate	Non-employed	No	HTN	Multiparous	Vagianl delivery	No	More than 3 months	with leg pain	Gradual	More than 3 months	Exercise in general	yes
134	F	55	Overweight	Married	High	Non-employed	No	DM	Primiparous	CS	No	3 months or less	with leg pain	Gradual	More than 3 months	Exercise in general	yes
45	M	56	Overweight	Married	Intermediate	Employed	Blow	No	NA	NA	No	More than 3 months	with leg pain	Gradual	More than 3 months	Exercise in general	yes
46	F	56	Obese	Married	Primary	Non-employed	No	Multi	Multiparous	Vagianl delivery	No	3 months or less	with leg pain	Gradual	More than 3 months	Ice or Heat	No
57	F	57	Normal	Married	High	Retired	Fall down	No	Multiparous	CS	No	3 months or less	with leg pain	Gradual	More than 3 months	Exercise in general	yes
97	F	57	Obese	Widow	Primary	Non-employed	No	No	Multiparous	Vagianl delivery	No	No	with leg pain	Gradual	More than 3 months	Ice or Heat	No
38	M	58	Overweight	Married	High	Retired	Fall down	No	NA	NA	No	No	with leg pain	Sudden	More than 3 months	Spinal manipulation (thrust)	yes
68	M	58	Overweight	Married	Intermediate	Retired	Fall down	Multi	NA	NA	Yes	No	with leg pain	Gradual	More than 3 months	Spinal manipulation (thrust)	yes
140	F	58	Overweight	Married	Illiterate	Non-employed	No	DM	Multiparous	CS	No	3 months or less	with leg pain	Gradual	More than 3 months	Ice or Heat	No
43	M	60	Overweight	Married	High	Retired	Accident	No	NA	NA	No	No	with leg pain	Sudden	More than 3 months	Exercise in general	yes
129	F	60	Overweight	Married	High	Retired	Fall down	No	Multiparous	Epidural anesthesia	No	More than 3 months	with leg pain	Sudden	More than 3 months	Exercise in general	yes
48	F	60	Normal	Married	Intermediate	Retired	Fall down	No	Multiparous	Vagianl delivery	No	More than 3 months	Low Back	Gradual	More than 3 months	Exercise in general	yes
63	F	60	Overweight	Widow	Illiterate	Non-employed	No	HTN	Multiparous	Vagianl delivery	No	3 months or less	with leg pain	Gradual	More than 3 months	Exercise in general	yes
81	M	60	Obese	Married	High	Retired	No	Multi	NA	NA	Yes	No	with leg pain	Sudden	More than 3 months	Spinal manipulation (thrust)	yes
100	F	60	Obese	Married	Illiterate	Non-employed	No	Multi	Multiparous	Vagianl delivery	No	No	with leg pain	Gradual	More than 3 months	Ice or Heat	No
104	F	60	Overweight	Married	Primary	Non-employed	No	No	Multiparous	Vagianl delivery	No	More than 3 months	with leg pain	Gradual	More than 3 months	Interferential current or transcutaneous electrical nerve stimulation	No
128	F	60	Normal	Married	Primary	Non-employed	Fall down	Multi	Multiparous	Vagianl delivery	No	More than 3 months	with leg pain	Gradual	More than 3 months	Exercise in general	yes
137	M	60	Overweight	Married	Intermediate	Employed	No	Multi	NA	NA	No	No	with leg pain	Gradual	More than 3 months	Bed rest	No
78	F	61	Obese	Widow	Intermediate	Employed	No	Multi	Multiparous	Vagianl delivery	No	No	Low Back	Gradual	More than 3 months	Ice or Heat	No
109	F	63	Obese	Widow	Primary	Non-employed	No	Multi	Multiparous	NA	No	3 months or less	with leg pain	Gradual	More than 3 months	Exercise in general	yes
34	M	64	Normal	Married	High	Retired	No	Multi	NA	NA	Yes	More than 3 months	with leg pain	Sudden	More than 3 months	Exercise in general	yes
119	F	64	Obese	Widow	Primary	Non-employed	No	HTN	Multiparous	Vagianl delivery	No	No	with leg pain	Gradual	More than 3 months	Ice or Heat	No
139	F	64	Obese	Married	Primary	Non-employed	Fall down	Multi	Multiparous	Vagianl delivery	No	More than 3 months	with leg pain	Gradual	More than 3 months	Interferential current or transcutaneous electrical nerve stimulation	No
36	M	65	Overweight	Married	High	Retired	No	HTN	NA	NA	No	More than 3 months	Low Back	Gradual	More than 3 months	Exercise in general	yes
54	F	65	Obese	Married	Primary	Non-employed	Fall down	No	Multiparous	Vagianl delivery	No	3 months or less	with leg pain	Gradual	More than 3 months	Ice or Heat	No
65	F	65	Overweight	Divorced	Intermediate	Employed	No	No	NA	NA	No	More than 3 months	with leg pain	Gradual	More than 3 months	Aerobic and Fitness Exercises	No
132	M	66	Normal	Married	High	Retired	No	Multi	NA	NA	No	More than 3 months	Low Back	Gradual	More than 3 months	Interferential current or transcutaneous electrical nerve stimulation	No
8	F	67	Obese	Married	Primary	Non-employed	No	DM	Multiparous	Vagianl delivery	Yes	No	Low Back	Gradual	More than 3 months	Interferential current or transcutaneous electrical nerve	No
71	F	68	Normal	Married	High	Retired	No	Multi	Multiparous	Vagianl delivery	No	3 months or less	with leg pain	Gradual	More than 3 months	Interferential current or transcutaneous electrical nerve stimulation	No
82	M	68	Normal	Married	High	Retired	No	DM	NA	NA	No	More than 3 months	with leg pain	Sudden	More than 3 months	Lumbar brace or corset	No
10	F	69	Overweight	Married	High	Retired	No	DM	Multiparous	Vagianl delivery	No	No	Low Back	Gradual	More than 3 months	o Lumbar stabilization exercises	yes
101	F	69	Overweight	Widow	Intermediate	Non-employed	No	Multi	Multiparous	Vagianl delivery	No	More than 3 months	with leg pain	Gradual	More than 3 months	Interferential current or transcutaneous electrical nerve stimulation	No
122	F	70	Underweight	Widow	Primary	Non-employed	No	Multi	Multiparous	Vagianl delivery	No	More than 3 months	with leg pain	Gradual	More than 3 months	Interferential current or transcutaneous electrical nerve stimulation	No
133	F	70	Overweight	Widow	Illiterate	Non-employed	Fall down	Multi	Multiparous	Vagianl delivery	No	More than 3 months	with leg pain	Gradual	More than 3 months	Interferential current or transcutaneous electrical nerve stimulation	No
35	M	71	Normal	Married	Primary	Retired	No	Multi	NA	NA	Yes	3 months or less	Low Back	Sudden	More than 3 months	Interferential current or transcutaneous electrical nerve stimulation	No
117	F	71	Overweight	Married	Illiterate	Non-employed	No	Multi	Multiparous	Vagianl delivery	No	No	with leg pain	Gradual	More than 3 months	Bed rest	No
59	M	72	Overweight	Single	Intermediate	Retired	No	DM	NA	NA	No	No	with leg pain	Gradual	More than 3 months	Interferential current or transcutaneous electrical nerve stimulation	No
70	M	76	Overweight	Married	Intermediate	Retired	No	DM	NA	NA	No	3 months or less	with leg pain	Gradual	More than 3 months	Interferential current or transcutaneous electrical nerve stimulation	No
